# Supplementary material for: Charge-shifting polyplex as a viral RNA extraction carrier for streamlined detection of infectious viruses
Source: Royal Society of Chemistry journal article supplement (doi:10.1039/d3mh00861d), 2023-01-01
Supplement: d3mh00861d1.pdf [file d3mh00861d1.pdf]

Electronic Supplementary Material (ESI) for Materials Horizons. This journal is © The Royal Society of Chemistry 2023

## Supporting Information

# Charge-shifting Polyplex as a viral RNA Extraction Carrier for Streamlined Detection of Infectious Viruses

Yunseong Song,<sup>a,‡</sup> Jayeon Song,<sup>b,‡</sup> Seongeun Kim<sup>a</sup>, Hyowon Jang<sup>b</sup>, Hogi Kim<sup>a</sup>, Booseok Jeong<sup>a</sup>, Nahyun Park<sup>a</sup>, Sunjoo Kim,<sup>c</sup> Dongeun Yong,<sup>d</sup> Eun-Kyung Lim,<sup>b,e,f</sup> Kyoung G. Lee,<sup>g\*</sup> Taejoon Kang,<sup>b,f\*</sup> and Sung Gap Im<sup>a\*</sup>

a. Department of Chemical and Biomolecular Engineering, Korea Advanced Institute of Science and Technology (KAIST), 291 Daehak-ro, Yuseong-gu, Daejeon 34141, Republic of Korea [sgim@kaist.ac.kr](mailto:sgim@kaist.ac.kr)

b. Bionanotechnology Research Center, Korea Research Institute of Bioscience and Biotechnology (KRIBB), 125 Gwahak-ro, Yuseong-gu, Daejeon 34141, Republic of Korea [kangtaejoon@kribb.re.kr](mailto:kangtaejoon@kribb.re.kr)

c. Department of Laboratory Medicine, Gyeongsang National University College of Medicine, 79 Gangnam-ro, Jinju-si, Gyeongsangnam-do 52727, Republic of Korea

d. Department of Laboratory Medicine and Research Institute of Bacterial Resistance, Yonsei University College of Medicine, 50-1 Yonsei-ro, Seodaemun-gu, Seoul 03722, Republic of Korea

e. Department of Nanobiotechnology, KRIBB School of Biotechnology, University of Science and Technology (UST), 217 Gajeong-ro, Yuseong-gu, Daejeon 34113, Republic of Korea

f. School of Pharmacy, Sungkyunkwan University (SKKU), 2066 Seobu-ro, Jangan-gu, Suwon 16419, Republic of Korea

g. Division of Nano-Bio Sensors/Chips Development, National NanoFab Center (NNFC), 291 Daehak-ro, Yuseong-gu, Daejeon 34141, Republic of Korea [kglee@nnfc.re.kr](mailto:kglee@nnfc.re.kr)

‡These authors contributed equally to this work.

Address correspondence to: [sgim@kaist.ac.kr](mailto:sgim@kaist.ac.kr) (S.G.I); [kangtaejoon@kribb.re.kr](mailto:kangtaejoon@kribb.re.kr) (T.K.);

[kglee@nnfc.re.kr](mailto:kglee@nnfc.re.kr) (K.G.L)

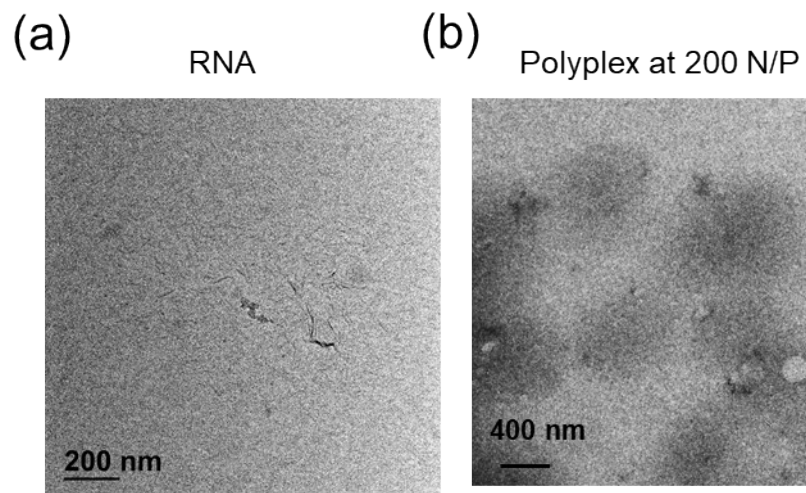

**Figure S1.** TEM micrograph of RNA and polyplex with the N/P ratio of 200.

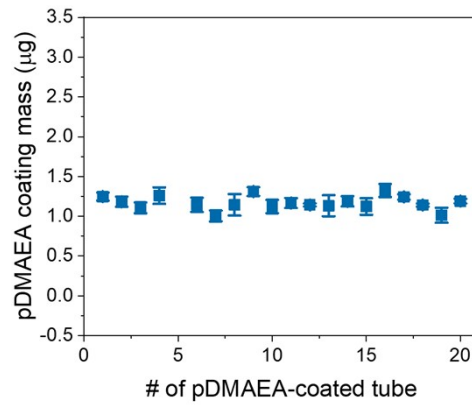

**Figure S2.** Quantitative analysis of pDMAEA coating on a PCR tube. pDMAEA coating mass of 20 tubes. The coating mass is determined by the concentration of pDMAEA solution obtained by introducing 20  $\mu\text{L}$  of distilled water to the pDMAEA-coated tubes. The results demonstrated a high level of consistency, with a range of error of 7.2% regarding the coating mass. This level of variation indicates that the iCVD process yields highly reproducible coating thicknesses on the PCR tubes.

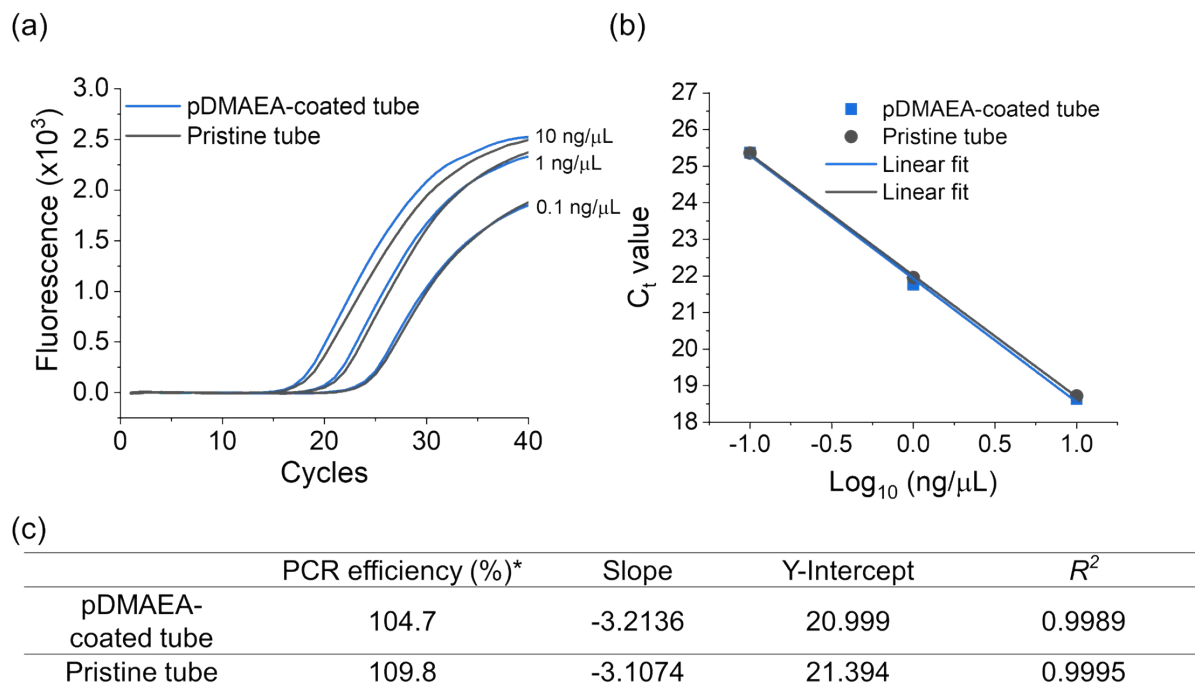

**Figure S3.** qRT-PCR inhibitory test of pDMAEA. (a) qRT-PCR amplification curves and (b) the corresponding  $C_t$  values of template RNA (0.1 to 10 ng/ $\mu$ L) in pDMAEA-coated and pristine tubes. (c) Summary of qRT-PCR results using pDMAEA-coated and pristine tubes. PCR efficiency (%)\* =  $\{(10^{-1/\text{slope}} - 1) \times 100\}$ .

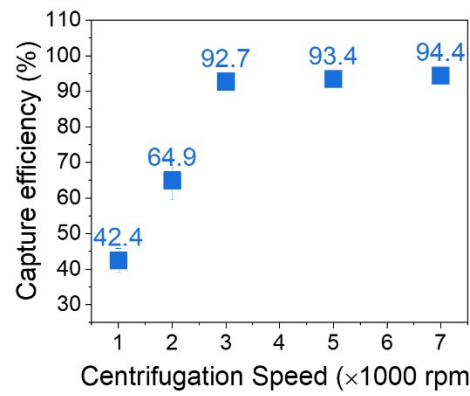

**Figure S4.** RNA capture efficiency of the pDMAEA-coated tube as a function of centrifuge speed ( $n = 3$ , error bar = standard deviation).

Base-catalyzed hydrolysis

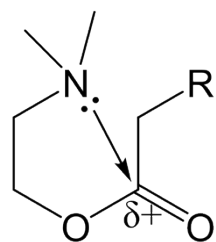

5-membered ring  
conformation

Acid-catalyzed hydrolysis

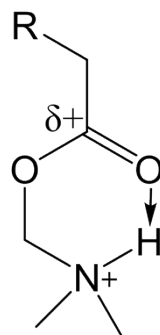

7-membered ring  
conformation

**Figure S5.** Self-catalyzed hydrolysis mechanism of DMAEA. 5-membered ring or 7-membered ring conformation can activate the ester moiety and make it more susceptible to nucleophilic attack by hydroxyl ions under basic and acidic conditions, respectively.  
[1]

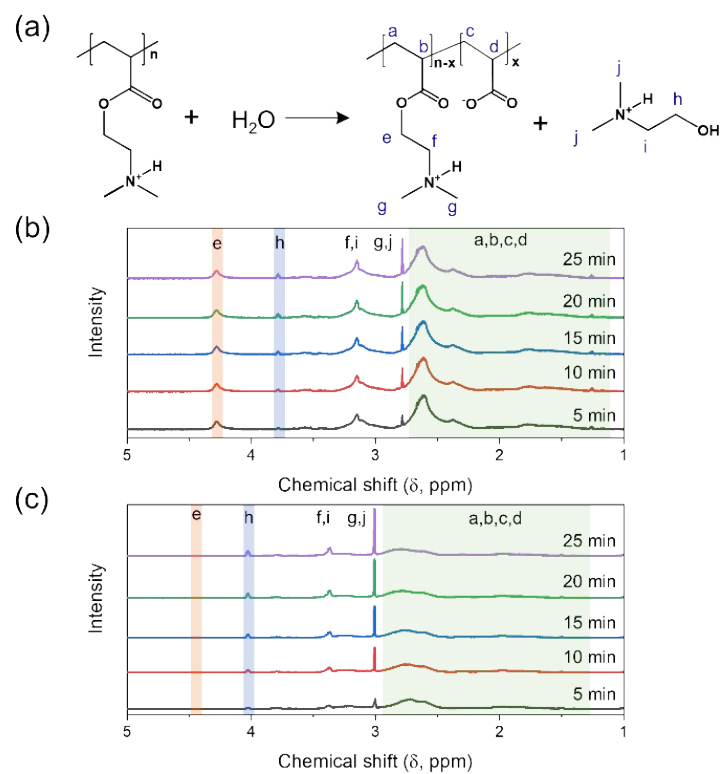

**Figure S6.** Real-time  $^1\text{H}$  NMR analysis of pDMAEA in buffered  $\text{D}_2\text{O}$  solution at 600 MHz. (a) Hydrolysis reaction of a pDMAEA. Chemical structure of a pDMAEA is denoted by the hydrogen positions. (b, c)  $^1\text{H}$  NMR spectra of pDMAEA at pH 8.0 for 25 min with 5 min intervals at (b) 25  $^\circ\text{C}$  and (c) 50  $^\circ\text{C}$ .

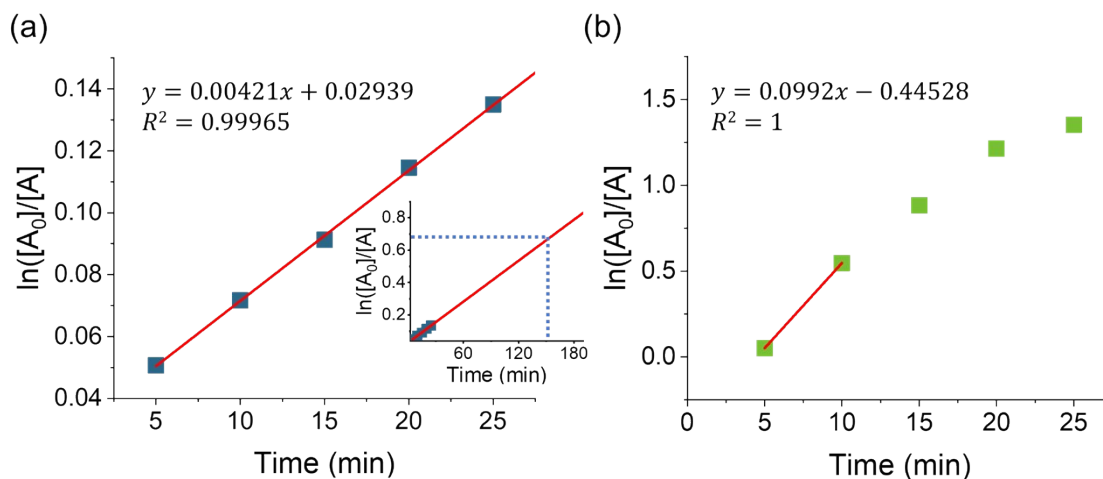

**Figure S7.** Linear first-order kinetic plots of the initial stages of pDMAEA hydrolysis. (a, b) Hydrolysis occurs in buffered D<sub>2</sub>O solutions at pH 8.0 at (a) 25 °C and (b) 50 °C. Inset of (a) is extrapolate plot for the half-life of the hydrolysis at 25 °C.



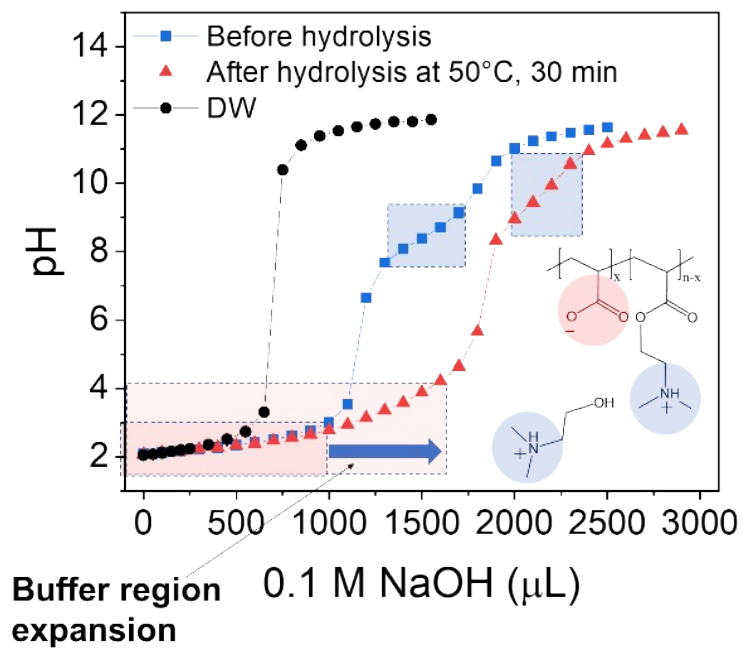

**Figure S8.** Potentiometric pH back-titration analysis of pDMAEA before and after hydrolysis. Blue and pink areas indicate tertiary amine group and acrylic acid group.

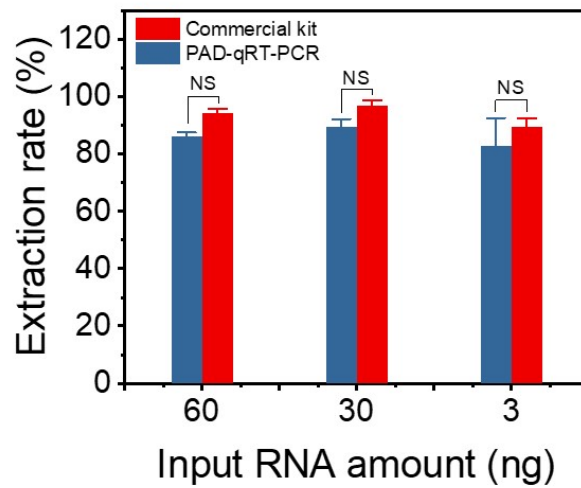

**Figure S9.** Comparison of extraction rates between the QIAamp Viral RNA Mini Kit (Qiagen) and PAD-qRT-PCR method at different initial RNA amounts (3 ng to 60 ng). Statistical significance is evaluated using Two sample t-test (Non-significance (NS) $P > 0.05$ ,  $*P < 0.05$ ,  $**P < 0.01$ ,  $***P < 0.001$ )

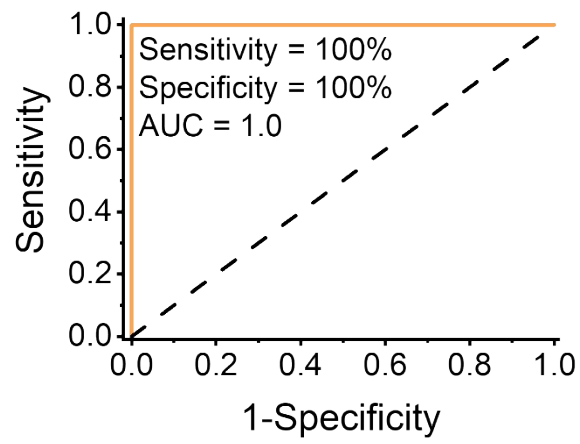

**Figure S10.** Receiver operating characteristic (ROC) curve generated from the clinical sample data of Figure 4e.

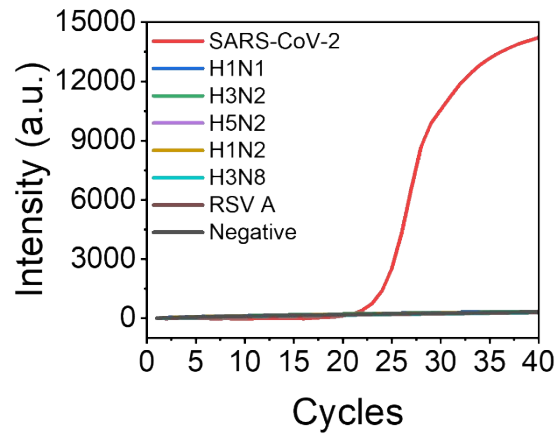

**Figure S11.** PAD-qRT-PCR amplification curves corresponding to Figure 5c.

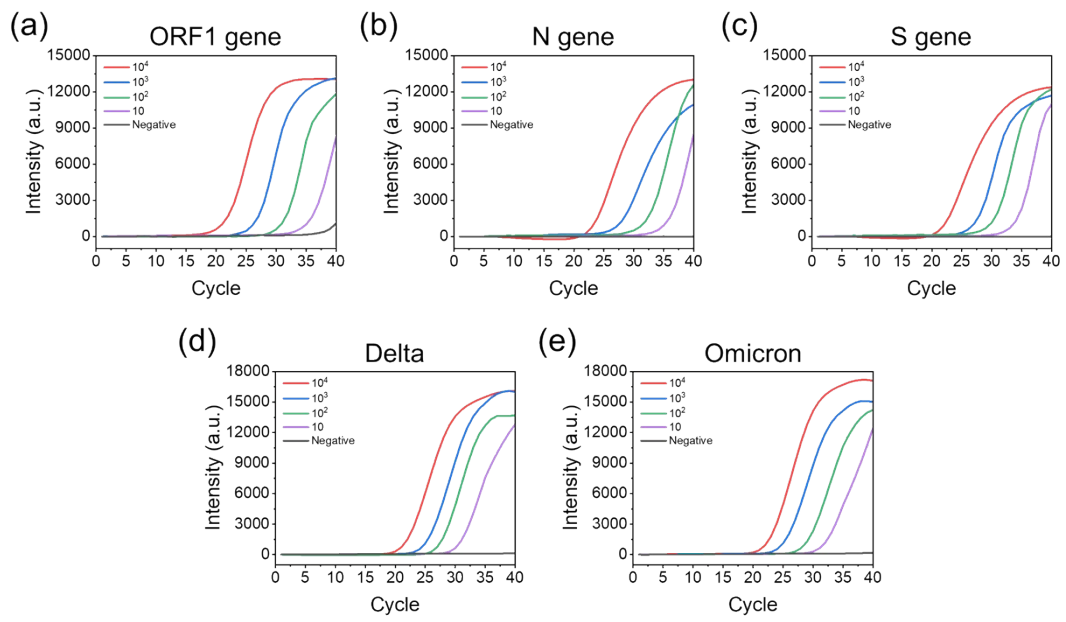

**Figure S12.** PAD-qRT-PCR amplification curves corresponding to Figure 5d-h.

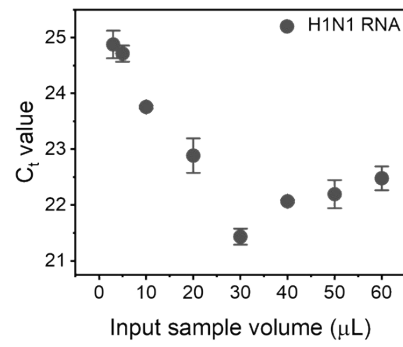

**Figure S13.** PAD-qRT-PCR results by varying input sample volume from 3  $\mu\text{L}$  to 60  $\mu\text{L}$ . Target H1N1 RNA concentration was 1  $\text{ng}/\mu\text{L}$ .  $C_t$  value from 30  $\mu\text{L}$  sample is the lowest.

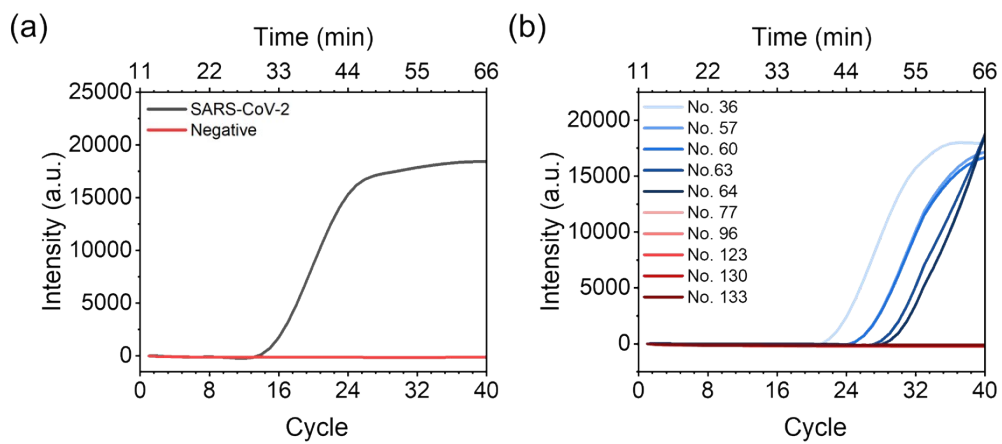

**Figure S14.** Compatibility of pDMAEA-coated tube with rapid qRT-PCR kit (TaqPath™ 1-step Multiplex Master Mix). (a, b) PAD-qRT-PCR results under the fast qRT-PCR condition for the detection of (a) SARS-CoV-2 ( $10^5$  PFU/mL) and (b) clinical samples (sample numbers are referred from Table S4).

**Table S1.** Primer sequences used in this study.

| Target    | Name  | Position    | Sequence (5' → 3')                                                              |
|-----------|-------|-------------|---------------------------------------------------------------------------------|
| ORF1 gene | FP    | 13342–13362 | CCC TGT GGG TTT TAC ACT TAA                                                     |
|           | Probe | 13377–13404 | FAM <sup>a</sup> – CCG TCT GCG GTA TGT GGA AAG GTT ATG G –<br>BHQ1 <sup>b</sup> |
|           | RP    | 13442–13460 | ACG ATT GTG CAT CAG CTG A                                                       |
| N gene    | FP    | 29125–29144 | AAA TTT TGG GGA CCA GGA AC                                                      |
|           | Probe | 29222–29241 | FAM – ATG TCG CGC ATT GGC ATG GA – BHQ1                                         |
|           | RP    | 29263–29282 | TGG CAG CTG TGT AGG TCA AC                                                      |
| S gene    | FP    | 3064–3083   | ATY <sup>c</sup> AGR <sup>c</sup> GCT GCW <sup>c</sup> GAA ATC AG               |
|           | Probe | 3201–3220   | FAM – ATG AGG TGC TGA CTG AGG GA – BHQ1                                         |
|           | RP    | 3281–3300   | CCW TCA TGA CAA ATD <sup>c</sup> GCW GG                                         |
| Delta     | FP    | 22928–22952 | CCT TTT GAG AGA GAT ATT TCA ACT G                                               |
|           | Probe | 22960–22980 | FAM – TCA GGC CGG TAG CAA ACC TTG – BHQ1                                        |
|           | RP    | 23056–23079 | AGT ACT ACT ACT CTG TAT GGT TGG                                                 |
| Omicron   | FP    | 26503–26521 | TGG CAG GTT CCA ACG GTA C                                                       |
|           | Probe | 26454–26568 | FAM – AGC TCC TTG AAG AAT GGA ACC TAG – BHQ1                                    |
|           | RP    | 26579–26604 | GAA GAC AAA TCC ATG TAA GGA ATA GG                                              |
| H1N1      | FP    | 49-68       | TCA GGC CCC CTC AAA GCC GA                                                      |
|           | Probe | 72-93       | FAM – CGC GCA GAG ACT GGA AAG TGT C – BHQ1                                      |
|           | RP    | 188-207     | GGG CAC GGT GAG CGT GAA CA                                                      |
| IBV       | FP    | 591-614     | AGG GGA AGA CCA AAT TAC TGT TTG                                                 |
|           | Probe | 629-656     | FAM – ATA ACA AAA CCC AAA TGA AGA GCC TCT A –<br>BHQ1                           |
|           | RP    | 676-697     | CAT TAG CAG ATG AGG TGA ACT T                                                   |



**Table S2.** Hospital results of clinical samples for influenza viruses.

| Number | Virus    | Sample type      | C <sub>t</sub> value |
|--------|----------|------------------|----------------------|
| 1      | H1N1     | Sputum           | 3.98                 |
| 2      | H1N1     | Sputum           | 6.16                 |
| 3      | H1N1     | Sputum           | 6.75                 |
| 4      | H1N1     | Sputum           | 7.85                 |
| 5      | H1N1     | NPS <sup>a</sup> | 9.65                 |
| 6      | H1N1     | NPS              | 12.17                |
| 7      | H1N1     | Sputum           | 12.62                |
| 8      | H1N1     | Sputum           | 14                   |
| 9      | H1N1     | Sputum           | 14.47                |
| 10     | H1N1     | Sputum           | 15.01                |
| 11     | H1N1     | Sputum           | 20.06                |
| 12     | IBV      | Sputum           | 5.98                 |
| 13     | IBV      | Sputum           | 6.79                 |
| 14     | IBV      | Sputum           | 6.79                 |
| 15     | IBV      | Sputum           | 7.53                 |
| 16     | IBV      | Sputum           | 8.12                 |
| 17     | IBV      | Sputum           | 10.98                |
| 18     | IBV      | Sputum           | 12.15                |
| 19     | IBV      | Sputum           | 13.47                |
| 20     | IBV      | Sputum           | 16.41                |
| 21     | Negative | NPS              | N/A                  |
| 22     | Negative | NPS              | N/A                  |
| 23     | Negative | NPS              | N/A                  |
| 24     | Negative | NPS              | N/A                  |
| 25     | Negative | NPS              | N/A                  |
| 26     | Negative | NPS              | N/A                  |
| 27     | Negative | NPS              | N/A                  |
| 28     | Negative | NPS              | N/A                  |
| 29     | Negative | NPS              | N/A                  |
| 30     | Negative | NPS              | N/A                  |
| 31     | Negative | NPS              | N/A                  |
| 32     | Negative | NPS              | N/A                  |
| 33     | Negative | NPS              | N/A                  |
| 34     | Negative | NPS              | N/A                  |
| 35     | Negative | NPS              | N/A                  |

**Table S3.** Comparison of detection methods for SARS-CoV-2. \*1 PFU/mL ~ 1000 copies/mL<sup>[6]</sup>

| Tech                                              | LOD (cp/rxn) | Sensitivity            | Specificity          | Assay time (min)                     | Compatibility | Variant detection |
|---------------------------------------------------|--------------|------------------------|----------------------|--------------------------------------|---------------|-------------------|
| <b>PAD-qRT-PCR</b>                                | <b>~ 10*</b> | <b>99.3% (144/145)</b> | <b>98.8% (79/80)</b> | <b>5 + 90 (extraction + qRT-PCR)</b> | <b>O</b>      | <b>O</b>          |
| SWCNT-based extraction and RT-qPCR <sup>[2]</sup> | 128          | N/A†                   | N/A                  | 60 + 90 (extraction + qRT-PCR)       | O             | O                 |
| RT-LAMP Harmony COVID-19 <sup>[3]</sup>           | 40           | 95% (39/41)            | 100% (4/4)           | 91 (extraction-free amplification)   | X             | O                 |
| SHINEv.2 <sup>[4]</sup>                           | 1000         | 90.5% (38/42)          | 100% (30/30)         | 90 (extraction-free amplification)   | X             | O                 |
| OIL-TAS + RT-qPCR or LAMP <sup>[5]</sup>          | 1000         | 100% (57/57)           | 100% (10/10)         | 30 + 30~50 (pretreatment + LAMP)     | O             | X                 |

†Not available

**Table S4.** Hospital results of clinical samples for WT SARS-CoV-2.

| Number | Sample type | C <sub>t</sub> value |       |       |       |
|--------|-------------|----------------------|-------|-------|-------|
|        |             | RdRP                 | E     | N     | AVG   |
| 1      | NPS         | 8.3                  | 8.7   | N/A   | 8.50  |
| 2      | NPS         | 9.37                 | 11.37 | N/A   | 10.37 |
| 3      | NPS         | 10.14                | 11.57 | N/A   | 10.86 |
| 4      | NPS         | 10.57                | 11.73 | N/A   | 11.15 |
| 5      | NPS         | 10.59                | 12.03 | N/A   | 11.31 |
| 6      | NPS         | 12.6                 | 10.94 | 10.81 | 11.45 |
| 7      | NPS         | 11.69                | 12.27 | N/A   | 11.98 |
| 8      | NPS         | 11.9                 | 12.8  | N/A   | 12.35 |
| 9      | NPS         | 11.56                | 11.9  | 13.8  | 12.42 |
| 10     | NPS         | 12.52                | 11.63 | 13.84 | 12.66 |
| 11     | NPS         | 11.13                | 12.88 | 16.52 | 13.51 |
| 12     | NPS         | 15.22                | 15.3  | 12.34 | 14.29 |
| 13     | NPS         | 15.36                | 12.78 | 15.09 | 14.41 |
| 14     | NPS         | 14.08                | 14.95 | N/A   | 14.52 |
| 15     | NPS         | 14.35                | 15.33 | 15.45 | 15.04 |
| 16     | NPS         | 14.71                | 15.65 | N/A   | 15.18 |
| 17     | NPS         | 14.7                 | 15.81 | N/A   | 15.26 |
| 18     | NPS         | 14.58                | 15.97 | N/A   | 15.28 |
| 19     | NPS         | 13.35                | 13.69 | 19.05 | 15.36 |
| 20     | NPS         | 14.98                | 15.93 | N/A   | 15.46 |
| 21     | NPS         | 15.28                | 15.85 | N/A   | 15.57 |
| 22     | NPS         | 15.16                | 16.24 | N/A   | 15.70 |
| 23     | NPS         | 15.24                | 16.25 | N/A   | 15.75 |
| 24     | NPS         | 16.2                 | 16.81 | N/A   | 16.51 |
| 25     | NPS         | 7.56                 | 25.52 | N/A   | 16.54 |
| 26     | NPS         | 15.35                | 16.73 | 19.04 | 17.04 |

| Number | Sample type | C <sub>t</sub> value |       |       |       |
|--------|-------------|----------------------|-------|-------|-------|
|        |             | RdRP                 | E     | N     | AVG   |
| 27     | NPS         | 15.47                | 16.6  | 19.48 | 17.18 |
| 28     | NPS         | 18.68                | 15.7  | 18.4  | 17.59 |
| 29     | Sputum      | 18.44                | 16.2  | 18.93 | 17.86 |
| 30     | NPS         | 18.54                | 17.76 | N/A   | 18.15 |
| 31     | NPS         | 19.21                | 17.96 | N/A   | 18.59 |
| 32     | NPS         | 18.7                 | 17.14 | 20.09 | 18.64 |
| 33     | NPSa        | 19.28                | 17.2  | 20.33 | 18.94 |
| 34     | NPS         | 18.97                | 17.63 | 20.6  | 19.07 |
| 35     | NPS         | 18.52                | 19.7  | N/A   | 19.11 |
| 36     | NPS         | 18.81                | 19.31 | 19.34 | 19.15 |
| 37     | NPS         | 19.37                | 19.29 | N/A   | 19.33 |
| 38     | NPS         | 17.96                | 19.05 | 22.5  | 19.84 |
| 39     | NPS         | 20.2                 | 20.6  | N/A   | 20.40 |
| 40     | Sputum      | 20.73                | 18.7  | 22.5  | 20.64 |
| 41     | Sputum      | 20.81                | 19.04 | 22.15 | 20.67 |
| 42     | NPS         | 21.59                | 19.16 | 21.91 | 20.89 |
| 43     | NPS         | 20.61                | 21.88 | N/A   | 21.25 |
| 44     | Sputum      | 22.1                 | 19.47 | 22.22 | 21.26 |
| 45     | NPS         | 21.27                | 22.41 | N/A   | 21.84 |
| 46     | NPS         | 21.93                | 23.05 | N/A   | 22.49 |
| 47     | Sputum      | 23.88                | 20.79 | 23.49 | 22.72 |
| 48     | NPS         | 22.37                | 23.07 | N/A   | 22.72 |
| 49     | NPS         | 23.98                | 23.35 | 26.16 | 24.50 |
| 50     | NPS         | 24.58                | 25.26 | N/A   | 24.92 |
| 51     | NPS         | 25.02                | 23.34 | 27.12 | 25.16 |
| 52     | NPS         | 25.11                | 26.1  | N/A   | 25.61 |
| 53     | NPS         | 25.26                | 26.53 | N/A   | 25.90 |

| Number | Sample type | C <sub>t</sub> value |       |       |       |
|--------|-------------|----------------------|-------|-------|-------|
|        |             | RdRP                 | E     | N     | AVG   |
| 54     | NPS         | 27.3                 | 24.34 | 27.02 | 26.22 |
| 55     | NPS         | 26.47                | 26.5  | N/A   | 26.49 |
| 56     | NPS         | 26.8                 | 27.56 | N/A   | 27.18 |
| 57     | NPS         | 27.36                | 27.07 | N/A   | 27.22 |
| 58     | NPS         | 27.15                | 27.38 | N/A   | 27.27 |
| 59     | NPS         | 26.19                | 27.26 | 33.01 | 28.82 |
| 60     | NPS         | 28.73                | 29.27 | N/A   | 29.00 |
| 61     | NPS         | 28.24                | 28.84 | 30.22 | 29.10 |
| 62     | NPS         | 29.19                | 29.06 | N/A   | 29.13 |
| 63     | NPS         | 29.95                | 28.73 | 29.16 | 29.28 |
| 64     | NPS         | 30.17                | 30.04 | N/A   | 30.11 |
| 65     | NPS         | 31.57                | 31.11 | 32.77 | 31.82 |
| 66     | NPS         | 31.43                | 32.7  | N/A   | 32.07 |
| 67     | Sputum      | 32.7                 | 30.94 | 32.58 | 32.07 |
| 68     | Sputum      | 33.21                | 30.61 | 33.11 | 32.31 |
| 69     | Sputum      | 33.11                | 30.97 | 33.45 | 32.51 |
| 70     | Sputum      | 33.11                | 30.97 | 33.45 | 32.51 |
| 71     | NPS         | 33.29                | 33.5  | 33.64 | 33.48 |
| 72     | Sputum      | 34.58                | 33.32 | 34.44 | 34.11 |
| 73     | NPS         | 35.48                | 35.33 | N/A   | 35.41 |
| 74     | NPS         | 36.38                | 35.49 | 38.86 | 36.91 |
| 75     | NPS         | 38.85                | 37.83 | 37.7  | 38.13 |
| 76     | NPS         | N/A                  | N/A   | N/A   | N/A   |
| 77     | NPS         | N/A                  | N/A   | N/A   | N/A   |
| 78     | NPS         | N/A                  | N/A   | N/A   | N/A   |
| 79     | NPS         | N/A                  | N/A   | N/A   | N/A   |
| 80     | NPS         | N/A                  | N/A   | N/A   | N/A   |

| Number | Sample type | C <sub>t</sub> value |     |     |     |
|--------|-------------|----------------------|-----|-----|-----|
|        |             | RdRP                 | E   | N   | AVG |
| 81     | NPS         | N/A                  | N/A | N/A | N/A |
| 82     | NPS         | N/A                  | N/A | N/A | N/A |
| 83     | NPS         | N/A                  | N/A | N/A | N/A |
| 84     | NPS         | N/A                  | N/A | N/A | N/A |
| 85     | NPS         | N/A                  | N/A | N/A | N/A |
| 86     | NPS         | N/A                  | N/A | N/A | N/A |
| 87     | NPS         | N/A                  | N/A | N/A | N/A |
| 88     | NPS         | N/A                  | N/A | N/A | N/A |
| 89     | NPS         | N/A                  | N/A | N/A | N/A |
| 90     | NPS         | N/A                  | N/A | N/A | N/A |
| 91     | NPS         | N/A                  | N/A | N/A | N/A |
| 92     | NPS         | N/A                  | N/A | N/A | N/A |
| 93     | NPS         | N/A                  | N/A | N/A | N/A |
| 94     | NPS         | N/A                  | N/A | N/A | N/A |
| 95     | NPS         | N/A                  | N/A | N/A | N/A |
| 96     | NPS         | N/A                  | N/A | N/A | N/A |
| 97     | NPS         | N/A                  | N/A | N/A | N/A |
| 98     | NPS         | N/A                  | N/A | N/A | N/A |
| 99     | NPS         | N/A                  | N/A | N/A | N/A |
| 100    | NPS         | N/A                  | N/A | N/A | N/A |
| 101    | NPS         | N/A                  | N/A | N/A | N/A |
| 102    | NPS         | N/A                  | N/A | N/A | N/A |
| 103    | NPS         | N/A                  | N/A | N/A | N/A |
| 104    | NPS         | N/A                  | N/A | N/A | N/A |
| 105    | NPS         | N/A                  | N/A | N/A | N/A |
| 106    | NPS         | N/A                  | N/A | N/A | N/A |
| 107    | NPS         | N/A                  | N/A | N/A | N/A |

| Number | Sample type | C <sub>t</sub> value |     |     |     |
|--------|-------------|----------------------|-----|-----|-----|
|        |             | RdRP                 | E   | N   | AVG |
| 108    | NPS         | N/A                  | N/A | N/A | N/A |
| 109    | NPS         | N/A                  | N/A | N/A | N/A |
| 110    | NPS         | N/A                  | N/A | N/A | N/A |
| 111    | NPS         | N/A                  | N/A | N/A | N/A |
| 112    | NPS         | N/A                  | N/A | N/A | N/A |
| 113    | NPS         | N/A                  | N/A | N/A | N/A |
| 114    | NPS         | N/A                  | N/A | N/A | N/A |
| 115    | NPS         | N/A                  | N/A | N/A | N/A |
| 116    | NPS         | N/A                  | N/A | N/A | N/A |
| 117    | NPS         | N/A                  | N/A | N/A | N/A |
| 118    | NPS         | N/A                  | N/A | N/A | N/A |
| 119    | NPS         | N/A                  | N/A | N/A | N/A |
| 120    | NPS         | N/A                  | N/A | N/A | N/A |
| 121    | NPS         | N/A                  | N/A | N/A | N/A |
| 122    | NPS         | N/A                  | N/A | N/A | N/A |
| 123    | NPS         | N/A                  | N/A | N/A | N/A |
| 124    | NPS         | N/A                  | N/A | N/A | N/A |
| 125    | NPS         | N/A                  | N/A | N/A | N/A |
| 126    | NPS         | N/A                  | N/A | N/A | N/A |
| 127    | NPS         | N/A                  | N/A | N/A | N/A |
| 128    | NPS         | N/A                  | N/A | N/A | N/A |
| 129    | NPS         | N/A                  | N/A | N/A | N/A |
| 130    | NPS         | N/A                  | N/A | N/A | N/A |
| 131    | NPS         | N/A                  | N/A | N/A | N/A |
| 132    | NPS         | N/A                  | N/A | N/A | N/A |
| 133    | NPS         | N/A                  | N/A | N/A | N/A |
| 134    | NPS         | N/A                  | N/A | N/A | N/A |
| 135    | NPS         | N/A                  | N/A | N/A | N/A |

**Table S5.** Hospital results of clinical samples for WT and delta SARS-CoV-2.

| Number | Variant | Sample type      | C <sub>t</sub> value |       |       |
|--------|---------|------------------|----------------------|-------|-------|
|        |         |                  | RdRP                 | E     | AVG   |
| 1      | Delta   | NPS              | 9.81                 | 10.64 | 10.23 |
| 2      | Delta   | NPS              | 10.42                | 10.13 | 10.28 |
| 3      | Delta   | NPS              | 10.28                | 10.53 | 10.41 |
| 4      | Delta   | NPS              | 10.35                | 10.54 | 10.45 |
| 5      | Delta   | NPS              | 11.59                | 11.89 | 11.74 |
| 6      | Delta   | NPS              | 12.32                | 12.53 | 12.43 |
| 7      | Delta   | NPS              | 12.89                | 12.88 | 12.89 |
| 8      | Delta   | NPS              | 13.38                | 13.41 | 13.40 |
| 9      | Delta   | NPS              | 13.83                | 13.65 | 13.74 |
| 10     | Delta   | NPS              | 13.65                | 13.92 | 13.79 |
| 11     | Delta   | NPS <sup>a</sup> | 14.09                | 13.58 | 13.84 |
| 12     | Delta   | NPS              | 13.73                | 14.02 | 13.88 |
| 13     | Delta   | NPS              | 13.81                | 13.98 | 13.90 |
| 14     | Delta   | NPS              | 13.86                | 14.42 | 14.14 |
| 15     | Delta   | NPS              | 13.72                | 15.13 | 14.43 |
| 16     | Delta   | NPS              | 15.13                | 13.89 | 14.51 |
| 17     | Delta   | NPS              | 14.25                | 15.10 | 14.68 |
| 18     | Delta   | NPS              | 13.32                | 16.47 | 14.90 |
| 19     | Delta   | NPS              | 15.06                | 15.17 | 15.12 |
| 20     | Delta   | NPS              | 15.43                | 15.41 | 15.42 |
| 21     | Delta   | NPS              | 16.17                | 15.50 | 15.84 |
| 22     | Delta   | NPS              | 15.62                | 16.37 | 16.00 |
| 23     | Delta   | NPS              | 16.27                | 16.30 | 16.29 |
| 24     | Delta   | NPS              | 16.80                | 16.39 | 16.60 |
| 25     | Delta   | NPS              | 17.02                | 16.25 | 16.64 |
| 26     | Delta   | NPS              | 18.11                | 15.34 | 16.73 |



| Number | Variant | Sample type | C <sub>t</sub> value |       |       |
|--------|---------|-------------|----------------------|-------|-------|
|        |         |             | RdRP                 | E     | AVG   |
| 27     | Delta   | NPS         | 16.85                | 17.54 | 17.20 |
| 28     | Delta   | NPS         | 18.37                | 16.37 | 17.37 |
| 29     | Delta   | NPS         | 16.83                | 18.02 | 17.43 |
| 30     | Delta   | NPS         | 18.21                | 16.67 | 17.44 |
| 31     | Delta   | NPS         | 18.36                | 16.58 | 17.47 |
| 32     | Delta   | NPS         | 17.74                | 17.48 | 17.61 |
| 33     | Delta   | NPS         | 17.48                | 18.23 | 17.86 |
| 34     | Delta   | NPS         | 17.45                | 18.31 | 17.88 |
| 35     | Delta   | NPS         | 19.65                | 16.41 | 18.03 |
| 36     | Delta   | NPS         | 20.10                | 16.98 | 18.54 |
| 37     | Delta   | NPS         | 18.56                | 18.80 | 18.68 |
| 38     | Delta   | NPS         | 18.26                | 19.25 | 18.76 |
| 39     | Delta   | NPS         | 19.15                | 19.00 | 19.08 |
| 40     | Delta   | NPS         | 18.55                | 20.15 | 19.35 |
| 41     | Delta   | NPS         | 19.21                | 19.56 | 19.39 |
| 42     | Delta   | NPS         | 21.29                | 20.14 | 20.72 |
| 43     | Delta   | NPS         | 20.04                | 21.40 | 20.72 |
| 44     | Delta   | NPS         | 22.02                | 20.11 | 21.07 |
| 45     | Delta   | NPS         | 21.06                | 21.23 | 21.15 |
| 46     | Delta   | NPS         | 22.14                | 21.08 | 21.61 |
| 47     | Delta   | NPS         | 23.79                | 20.82 | 22.31 |
| 48     | Delta   | NPS         | 22.67                | 23.32 | 23.00 |
| 49     | Delta   | NPS         | 24.28                | 22.19 | 23.24 |
| 50     | Delta   | NPS         | 25.73                | 23.69 | 24.71 |
| 51     | Delta   | NPS         | 25.24                | 25.27 | 25.26 |
| 52     | Delta   | NPS         | 25.20                | 26.27 | 25.74 |

| Number | Variant | Sample type | C <sub>t</sub> value |       |       |
|--------|---------|-------------|----------------------|-------|-------|
|        |         |             | RdRP                 | E     | AVG   |
| 53     | Delta   | NPS         | 27.48                | 24.73 | 26.11 |
| 54     | Delta   | NPS         | 30.15                | 26.68 | 28.42 |
| 55     | Delta   | NPS         | 28.11                | 29.87 | 28.99 |
| 56     | Delta   | NPS         | 29.36                | 28.64 | 29.00 |
| 57     | Delta   | NPS         | 28.82                | 30.81 | 29.82 |
| 58     | Delta   | NPS         | 30.75                | 29.74 | 30.25 |
| 59     | Delta   | NPS         | 30.72                | 32.54 | 31.63 |
| 60     | Delta   | NPS         | 31.73                | 32.31 | 32.02 |
| 61     | WT      | NPS         | 9.37                 | 11.37 | 10.37 |
| 62     | WT      | NPS         | 10.14                | 11.57 | 10.86 |
| 63     | WT      | NPS         | 10.57                | 11.73 | 11.15 |
| 64     | WT      | NPS         | 10.59                | 12.03 | 11.31 |
| 65     | WT      | NPS         | 11.13                | 12.88 | 12.01 |
| 66     | WT      | NPS         | 11.56                | 11.90 | 11.73 |
| 67     | WT      | NPS         | 11.69                | 12.27 | 11.98 |
| 68     | WT      | NPS         | 12.40                | 12.19 | 12.30 |
| 69     | WT      | NPS         | 12.52                | 11.63 | 12.08 |
| 70     | WT      | NPS         | 13.35                | 13.69 | 13.52 |

**Table S6.** Hospital results of clinical samples for WT and omicron SARS-CoV-2.

| Number | Variant | Sample type | C <sub>t</sub> value |       |       |
|--------|---------|-------------|----------------------|-------|-------|
|        |         |             | RdRP                 | E     | AVG   |
| 1      | Omicron | NPS         | 14.81                | 14.68 | 14.75 |
| 2      | Omicron | NPS         | 14.85                | 15.37 | 15.11 |
| 3      | Omicron | NPS         | 15.24                | 15.96 | 15.60 |
| 4      | Omicron | NPS         | 16.89                | 15.21 | 16.05 |
| 5      | Omicron | NPS         | 16.77                | 16.95 | 16.86 |
| 6      | Omicron | NPS         | 17.3                 | 18.16 | 17.73 |
| 7      | Omicron | NPS         | 22.08                | 20.77 | 21.43 |
| 8      | Omicron | NPS         | 23.45                | 21.7  | 22.58 |
| 9      | Omicron | NPS         | 23.98                | 24.67 | 24.33 |
| 10     | Omicron | NPS         | 29.34                | 29.24 | 29.29 |
| 11     | WT      | NPS         | 9.37                 | 11.37 | 10.37 |
| 12     | WT      | NPS         | 10.14                | 11.57 | 10.86 |
| 13     | WT      | NPS         | 10.57                | 11.73 | 11.15 |
| 14     | WT      | NPS         | 10.59                | 12.03 | 11.31 |
| 15     | WT      | NPS         | 11.13                | 12.88 | 12.01 |
| 16     | WT      | NPS         | 11.56                | 11.90 | 11.73 |
| 17     | WT      | NPS         | 11.69                | 12.27 | 11.98 |
| 18     | WT      | NPS         | 12.40                | 12.19 | 12.30 |
| 19     | WT      | NPS         | 12.52                | 11.63 | 12.08 |
| 20     | WT      | NPS         | 13.35                | 13.69 | 13.52 |

**Table S7.** Material cost in this assay, material cost per 1 batch (iCVD process), and cost per 100 reactions of PAD-qRT-PCR kit

| <b>Material cost</b>                                                                 |                 |                   |
|--------------------------------------------------------------------------------------|-----------------|-------------------|
| <b>Materials</b>                                                                     | <b>Amount</b>   | <b>Price (\$)</b> |
| 2-(Dimethylamino)ethyl acrylate<br>(DMAEA, 98%, Merck, Germany)                      | 500 mL          | 324               |
| Tert-butyl peroxide (TBPO, 98%, Merck,<br>Darmstadt, Germany)                        | 1 L             | 183               |
| 8-strip PCR tube (Bio-rad, USA)                                                      | 960 ea (a tube) | 120               |
| 8-strip PCR cap (Bio-rad, USA)                                                       | 960 ea (a tube) | 46.0              |
| Nuclease-free water (Merck,<br>Germany)                                              | 10 L            | 63.0              |
| EDTA, Disodium Salt, Dihydrate<br>(MW 292.2438 g/mol, Fisher<br>Scientific, USA)     | 100 g           | 102.              |
| Lysis buffer<br>Pierce™ TCEP-HCl (MW<br>286.65 gram/mol, Thermo<br>Scientific™, USA) | 10 g            | 200               |
| Proteinase K Solution (800<br>units/mL, NEB, USA)                                    | 800 ea          | 91.0              |
| RiboLock RNase Inhibitor (40<br>U/μL, Thermo Scientific™,<br>USA)                    | 2500 ea         | 85.0              |
| <b>Total</b>                                                                         |                 | <b>1214</b>       |

---

**Cost per iCVD 1 batch**

---

| <b>Materials</b> | <b>Amount</b>          | <b>Price (\$)</b> |
|------------------|------------------------|-------------------|
| 8-strip PCR tube | 384 ea (a tube)        | 66.4              |
| DMAEA            | 2 mL                   | 1.30              |
| TBPO             | 2 mL                   | 0.366             |
| <b>Total</b>     | <b>384 ea (a tube)</b> | <b>68.1</b>       |

---

**Cost per 100 reactions**

---

| <b>Components</b>                                                                                                                                   | <b>Amount</b>   | <b>Price (\$)</b> |
|-----------------------------------------------------------------------------------------------------------------------------------------------------|-----------------|-------------------|
| pDMAEA-coated tube                                                                                                                                  | 100 ea (a tube) | 17.7              |
| 8-strip PCR cap                                                                                                                                     | 960 ea (a tube) | 46.0              |
| Nuclease-free water                                                                                                                                 | 10 mL           | 0.0630            |
| Lysis buffer {1 mM EDTA, 100 mM<br>TCEP-HCl, 100 $\mu$ L Nuclease-free water,<br>proteinase K (0.8 U/reaction), Rnase<br>inhibitor (10 U/reaction)} | 10 mL           | 43.7              |
| <b>Total</b>                                                                                                                                        |                 | <b>107</b>        |

---

**Table S8.** Estimated material and market cost for molecular diagnostics of SARS-CoV-2.

| <b>Name</b>                | <b>Method</b>                    | <b>Material</b>                                       | <b>Equipment</b> | <b>Cost/hundred reactions (\$)</b> |
|----------------------------|----------------------------------|-------------------------------------------------------|------------------|------------------------------------|
| Sample Pretreatment method | Our method                       | pDMAEA-coated tube, lysis buffer, nuclease-free water | Mini-centrifuge  | 107 <sup>a</sup>                   |
|                            | Silica Spin Column-based RNA kit | QIAamp Viral RNA Mini Kit                             | Mini-centrifuge  | 628 <sup>b,6</sup>                 |
|                            | Magnetic bead-based RNA kit      | NucleoMag® Pathogen                                   | Magnet rack      | 441 <sup>b,7</sup>                 |

<sup>a</sup> Estimated material cost<sup>b</sup> Approximate market cost

**Table S9.** Comparison of pDMAEA tube with a commercial extraction kit.

|                             | <b>PAD-qRT-PCR</b>                                            | <b>Commercial kit<sup>b</sup></b>                             |
|-----------------------------|---------------------------------------------------------------|---------------------------------------------------------------|
| Technology                  | pDMAEA-coated tube                                            | Silica technology                                             |
| Time                        | 5 min                                                         | 40 min                                                        |
| Cost/hundred reactions (\$) | 107 <sup>a</sup>                                              | 682                                                           |
| Processing                  | Manual (1 centrifugation step)                                | Manual (4 centrifugation steps + 2 washing steps)             |
| Recovery Yield              | 85%                                                           | 90%                                                           |
| Main sample type            | Liquid media                                                  | Liquid media                                                  |
| Sample amount               | 3~10 $\mu$ L                                                  | 140 $\mu$ L                                                   |
| Elution Volume              | 25 $\mu$ L (PCR mixture)                                      | 50 $\mu$ L (distilled water)                                  |
| Format                      | Tube                                                          | Spin columns                                                  |
| Applications                | PCR, qPCR, real-time PCR, or other gene amplification methods | PCR, qPCR, real-time PCR, or other gene amplification methods |

<sup>a</sup> Estimated material cost<sup>b</sup> Commercial kit (QIAamp Viral RNA Mini Kit, 52904) was purchased from Qiagen

## References

- [1] P. Van de Wetering, N. Zuidam, M. Van Steenbergen, O. Van Der Houwen, W. Underberg, W. Hennink, *Macromolecules* **1998**, 31, 8063.
- [2] S. Jeong, E. González-Grandío, N. Navarro, R. L. Pinals, F. Ledesma, D. Yang, M. P. Landry, *ACS nano* **2021**, 15, 10309.
- [3] N. Panpradist, E. C. Kline, R. G. Atkinson, M. Roller, Q. Wang, I. T. Hull, J. H. Kotnik, A. K. Oreskovic, C. Bennett, D. Leon, *Science Advances* **2021**, 7, eabj1281.
- [4] J. Arizti-Sanz, A. D. Bradley, Y. B. Zhang, C. K. Boehm, C. A. Freije, M. E. Grunberg, T.-S. F. Kosoko-Thoroddsen, N. L. Welch, P. P. Pillai, S. Mantena, *Nature Biomedical Engineering* **2022**, 1.
- [5] D. S. Juang, T. D. Juang, D. M. Dudley, C. M. Newman, M. A. Accola, W. M. Rehrauer, T. C. Friedrich, D. H. O'Connor, D. J. Beebe, *Nature Communications* **2021**, 12, 4317.
- [6] K. Uhteg, J. Jarrett, M. Richards, C. Howard, E. Morehead, M. Geahr, L. Gluck, A. Hanlon, B. Ellis, H. Kaur, *Journal of Clinical Virology* **2020**, 127, 104384.
